**A-997 Room 301, 10/18/2000 2:00 PM - 3:30 PM (PD)**  
**Postoperative Analgesic Effects of Celecoxib or Rofecoxib after Spinal Fusion Surgery** Scott S. Reuben, MD; Neil Roy Connelly, MD, *Anesthesiology, Baystate Medical Center, Springfield, MA, United States*. Rofecoxib provided increased benefit compared to celecoxib in patients undergoing spinal fusion surgery.

**A-998 Room 301, 10/18/2000 2:00 PM - 3:30 PM (PD)**  
**A Randomized Prospective Study of Long-Term Recovery from Major Thoracotomy** E. Andrew Ochroch, M.D.; Allan Gottschalk, M.D., PHD; Janni Augostides, M.D.; Larry R. Kaiser, M.D.; Stanley J. Aukburg, M.D., *Anesthesiology, University of Pennsylvania Health System, Philadelphia, PA, United States*. Preemptive analgesia did not impact pain or activity during the first year after thoracotomy. Women did suffer more pain than men.

**A-999 Room 301, 10/18/2000 2:00 PM - 3:30 PM (PD)**  
**Intravenous Ketoprofen in Thyroid and Parathyroid Surgery** Emmanuel R. Basto, MD; Catherine Waintrop, MD; Jerome Landru, MD; Benoit Eurin, MD; Laurent Jacob, MD, *Anesthesiology, Saint-Louis Hospital, Paris, France*

**A-1000 Room 301, 10/18/2000 2:00 PM - 3:30 PM (PD)**  
**Multimodal Management Improves Postoperative Metabolism and Recovery** Gerhard Brodner, MD, PhD; Christiane Goeters, MD; Hartmut Buerkle, MD, PhD; Marco A.E. Marcus, MD, PhD; Hugo Van Aken, MD, PhD, *Klinik fuer Anaesthesiologie u. Operative Intensivmedizin, Westf. Wilhelms-Universitaet, Muenster, Germany*. Combined thoracic epidural analgesia, forced mobilization and enteral nutrition improve postoperative recovery

**A-1001 Room 301, 10/18/2000 2:00 PM - 3:30 PM (PD)**  
**Intrathecal Adenosine Reduces the Areas of Hyperalgesia and Allodynia Which Follow Intradermal Capsaicin in Volunteers** D.D. Hood, M.D.; J.C. Eisenach, M.D.; R. Curry, R.N., *Anesth. Dept., Wake Forest Univ. Sch. of Med., Winston-Salem, NC, United States*. Intrathecal adenosine, 2.0 mg, reduces the area of hyperalgesia and allodynia in volunteers, which follows intradermal capsaicin for up to 24 hours.

**A-1002 Room 301, 10/18/2000 2:00 PM - 3:30 PM (PD)**  
**Celecoxib Is as Effective as Hydrocodone in the Treatment of Post-Orthopedic Surgical Pain** A.M. Brugger; D.T. Drupka; W.W. Zhao; K.M. Verburg; G.S. Geis, *Clinical Research and Development, GD Searle & Co, Skokie, IL, United States*. CEL 200 mg showed analgesic efficacy comparable (SD) or significantly superior (MD) to HD/AC in patients with surgical pain. Celecoxib was well tolerated.
